# Supplementary material for: Optical signature of erythrocytes by light scattering in microfluidic flows
Source: Royal Society of Chemistry journal article supplement (doi:10.1039/c5lc00525f), 2015-01-01
Supplement: c5lc00525f1.pdf [file c5lc00525f1.pdf]

## Supporting information for Lab on a Chip:

### Optical signature of erythrocytes by light scattering in microfluidic flows

D. Dannhauser,<sup>a</sup> D. Rossi,<sup>a</sup> F. Causa,<sup>b</sup> P. Memmolo,<sup>a,c</sup> A. Finizio,<sup>c</sup> T. Wriedt,<sup>d</sup> J. Hellmers,<sup>e</sup> Y. Eremin,<sup>f</sup> P. Ferraro<sup>c</sup> and P. A. Netti<sup>a,b</sup>.

<sup>a</sup> Center for Advanced Biomaterials for Healthcare@CRIB, Istituto Italiano di Tecnologia (IIT), Largo Barsanti e Matteucci 53, 80125 Naples, Italy.

<sup>b</sup> Interdisciplinary Research Centre on Biomaterials (CRIB), Università degli Studi di Napoli "Federico II", Piazzale Tecchio 80, 80125 Naples, Italy.

<sup>c</sup> CNR-ISASI Institute of Applied Sciences & Intelligent Systems "E. Caianiello", via Campi Flegrei 34, 80078 Pozzuoli, Italy.

<sup>d</sup> Institut für Werkstofftechnik, Badgasteiner Str. 3, 28359 Bremen, Germany.

<sup>e</sup> Particle and Process Engineering, FB4, University of Bremen, Badgasteiner Str. 3, 28359 Bremen, Germany.

<sup>f</sup> Faculty of Applied Mathematics and Computer Science, Moscow State University, Lenins Hills, 119992 Moscow, Russia.

We investigated the cell viability of mature erythrocytes in viscoelastic medium (phosphate-buffered saline with poly-ethylene oxide), by bright field microscope observations, before and after each light scattering measurement. In general, a noticeable difference between healthy (a) and unhealthy (b) erythrocyte morphology can be observed with such a simple microscope observation.

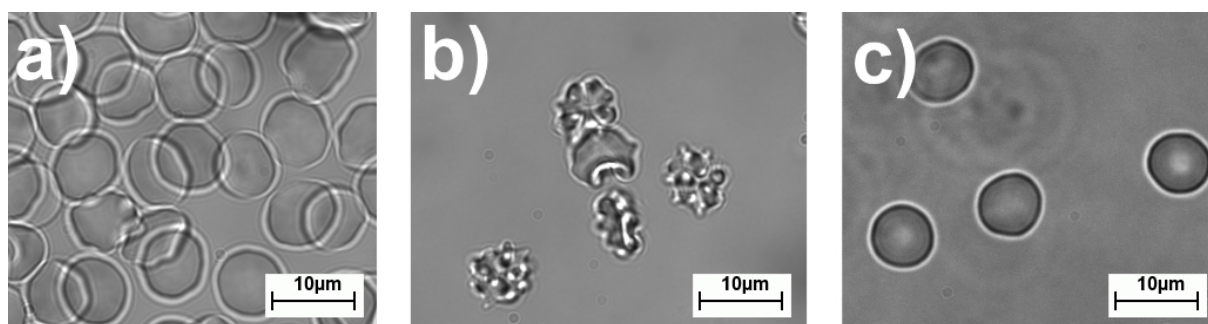

Fig. S1: Micrographs of erythrocytes in a solution of phosphate-buffered saline with poly-ethylene oxide. All cells have been observed by a bright field microscope using a 100x objective. a) shows healthy erythrocytes, while in b) unhealthy erythrocyte are illustrated. c) shows erythrocytes after the light scattering measurements.
